# Supplementary material for: Characterization of Blf4, an Archaeal Lytic Virus Targeting a Member of the Methanomicrobiales
Source: MDPI journal article supplement (doi:10.3390/v13101934), 2021-09-26
Supplement: s1 [file s1]

## **Supplementary Information**

### **Characterization of Blf4, an archaeal lytic virus targeting a member of the Methanomicrobiales**

Katrin Weidenbach, Sandro Wolf, Anne Kupczok, Tobias Kern, Martin A. Fischer, Jochen Reetz, Natalia Urbańska, Sven Künzel, Ruth A. Schmitz and Michael Rother

Supplementary Table S1: GC content of the draft genome of *M. bourgensis* E02.3

| contig number | contig length (bp) | GC content |
|---------------|--------------------|------------|
| contig 1      | 710727             | 60.7 %     |
| contig 2      | 496511             | 60.8 %     |
| contig 3      | 342169             | 60 %       |
| contig 4      | 275614             | 60.8 %     |
| contig 5      | 237631             | 59 %       |
| contig 6      | 205485             | 61.3 %     |
| contig 7      | 147952             | 62.1 %     |
| contig 8      | 141118             | 61.7 %     |
| contig 9      | 85938              | 62.2 %     |

Supplementary Table S2: Genome sizes of *M. bourgensis* strains.

| Strain                     | Accession number | Genome size  |
|----------------------------|------------------|--------------|
| <i>M. bourgensis</i> E02.3 | GCA_018495055.1  | 2,643,145 bp |
| <i>M. bourgensis</i> MAB1  | LT158599         | 2,859,299 bp |
| <i>M. bourgensis</i> MS2T  | HE964772         | 2,789,774 bp |

Supplementary Table S3: Open reading frames in the Blf4 genome with similarity to described proteins in databases.

| ORF # | Start (nt) | Stop (nt) | Length <sup>a</sup> | Predicted function                                | Predicted with                                                                  |
|-------|------------|-----------|---------------------|---------------------------------------------------|---------------------------------------------------------------------------------|
| 1     | 32         | 301       | 89                  | putative membrane protein                         | Phyre2<br>Confidence: 45.2 %<br>Identity: 48 %                                  |
| 2     | 298        | 549       | 83                  | putative membrane protein                         | Phyre2<br>Confidence: 32.8 %<br>Identity: 20 %                                  |
| 3     | 546        | 692       | 43                  | hypothetical protein                              | RAST                                                                            |
| 4     | 685        | 1245      | 186                 | HTH transcription regulator                       | BLASTP<br>E-value: 1 <sup>-10</sup>                                             |
| 5     | 1242       | 2486      | 414                 | DNA modification methylase (replication)          | RAST                                                                            |
| 6     | 2532       | 2942      | 136                 | hypothetical protein (DUF523 domain)              | Phyre2<br>Confidence: 100 %<br>Identity: 40 %                                   |
| 7     | 2961       | 4436      | 491                 | phage terminase, large subunit (replication)      | RAST<br>VIRFAM; seq. identity 19 – 36 % <sup>c</sup>                            |
| 8     | 4540       | 4848      | 102                 | hypothetical protein                              | RAST                                                                            |
| 9     | 4845       | 5093      | 82                  | hypothetical protein                              | RAST                                                                            |
| 10    | 5161       | 6798      | 535                 | phage portal protein (structural function)        | BLASTP:<br>E-value: 1 <sup>-84</sup>                                            |
| 11    | 6795       | 7604      | 269                 | phage portal protein (structural function)        | BLASTP:<br>E-value: 7 <sup>-36</sup><br>VIRFAM; seq. identity 19 % <sup>c</sup> |
| 12    | 7601       | 8695      | 364                 | putative GNAT family N-acetyltransferase          | BLASTP:<br>E-value: 2 <sup>-73</sup>                                            |
| 13    | 8698       | 9075      | 125                 | hypothetical protein (DUF2190 containing protein) | Phyre2<br>Confidence: 25.8 %                                                    |

|    |       |       |     |                                                                                   |                                                                                     |
|----|-------|-------|-----|-----------------------------------------------------------------------------------|-------------------------------------------------------------------------------------|
|    |       |       |     |                                                                                   | Identity: 27 %                                                                      |
| 14 | 9076  | 10263 | 395 | Major capsid protein<br>(structural function)                                     | VIRFAM; seq. identity 19-23 %<br>c                                                  |
| 15 | 10290 | 10430 | 46  | putative viral transmembrane<br>protein (gp41) (envelope;<br>structural function) | Phyre2<br>Confidence: 15 %<br>Identity: 33 %                                        |
| 16 | 10427 | 10795 | 122 | head tail adapter protein<br>(structural function)                                | VIRFAM; seq. identity 24 % c                                                        |
| 17 | 10795 | 11145 | 116 | head closure protein protein<br>(structural function)                             | VIRFAM; seq. identity 11-16 %<br>c                                                  |
| 18 | 11142 | 11393 | 83  | putative antiCRISPR protein                                                       | PaCRISPR<br>score <sup>b</sup> : 0.51                                               |
| 19 | 11390 | 11815 | 141 | HK97gp10 family phage<br>protein<br>-neck protein<br>(structural function)        | BLASTP:<br>E-value: 1 <sup>-16</sup><br>VIRFAM; seq. identity 30-31 %<br>c          |
| 20 | 11816 | 12199 | 127 | tail terminator protein;<br>tail completion                                       | Phyre2<br>Confidence: 100 %<br>Identity: 15 %<br>VIRFAM; seq. identity 24-25 %<br>c |
| 21 | 12204 | 13004 | 266 | hypothetical protein                                                              | RAST                                                                                |
| 22 | 13007 | 13366 | 119 | hypothetical protein                                                              | RAST                                                                                |
| 23 | 13459 | 13620 | 53  | tail fiber protein S (tail,<br>structural function)                               | Phyre2<br>Confidence: 12.8 %<br>Identity: 45 %                                      |
| 24 | 13610 | 16072 | 820 | phage tail tape measure<br>protein, TP901 family (tail,<br>structural function)   | RAST                                                                                |
| 25 | 16069 | 16230 | 53  | phage tail protein or putative<br>Acr                                             | PaCRISPR<br>score <sup>b</sup> : 0.605                                              |
| 26 | 16233 | 16580 | 115 | capsid assembly protein<br>(structural function)                                  | Phyre2<br>Confidence: 15 %<br>Identity: 16 %                                        |
| 27 | 16581 | 18068 | 495 | phage protein                                                                     | RAST                                                                                |
| 28 | 18148 | 18324 | 58  | putative antiCRISPR protein                                                       | PaCRISPR<br>score <sup>b</sup> : 0.641                                              |
| 29 | 18328 | 18759 | 143 | putative envelope glycoprotein<br>(structural function)                           | Phyre2<br>Confidence: 51.3 %<br>Identity: 41 %                                      |
| 30 | 18756 | 19094 | 112 | base plate upper protein<br>(structural function)                                 | BLASTP:<br>E-value: 5 <sup>-51</sup>                                                |
| 31 | 19186 | 20046 | 286 | viral protein                                                                     | Phyre2<br>Confidence: 100 %<br>Identity: 17 %                                       |
| 32 | 20052 | 20297 | 81  | hypothetical protein                                                              | RAST                                                                                |
| 33 | 20294 | 22471 | 725 | Siphovirus Regi Pepy 6 GP37<br>family protein                                     | BLASTP:<br>E-value: 1 <sup>-82</sup>                                                |
| 34 | 22468 | 23640 | 390 | Tail fiber protein<br>(structural function)                                       | BLASTP:<br>E-value: 2 <sup>-23</sup>                                                |

|    |       |       |     |                                                                |                                                |
|----|-------|-------|-----|----------------------------------------------------------------|------------------------------------------------|
| 35 | 23678 | 24022 | 114 | hypothetical protein                                           | RAST                                           |
| 36 | 24185 | 24550 | 121 | putative antiCRISPR protein                                    | PaCRISPR<br>score <sup>b</sup> : 0.611         |
| 37 | 24761 | 24982 | 73  | putative antiCRISPR protein                                    | PaCRISPR<br>score <sup>b</sup> : 0.769         |
| 38 | 25150 | 25350 | 66  | hypothetical protein                                           | RAST                                           |
| 39 | 25440 | 25607 | 55  | hypothetical protein (fold:<br>Ribbon-helix-helix)             | Phyre2<br>Confidence: 35.5 %<br>Identity: 39 % |
| 40 | 25604 | 25948 | 114 | putative antiCRISPR protein                                    | PaCRISPR<br>score <sup>b</sup> : 0.535         |
| 41 | 25933 | 26304 | 123 | putative antiCRISPR protein                                    | PaCRISPR<br>score <sup>b</sup> : 0.605         |
| 42 | 26304 | 26486 | 60  | BC1881 family protein                                          | BLASTP:<br>evalue: 6e-04                       |
| 43 | 26486 | 26905 | 139 | putative antiCRISPR protein                                    | PaCRISPR<br>score <sup>b</sup> : 0.589         |
| 44 | 26902 | 27201 | 99  | putative antiCRISPR protein                                    | PaCRISPR<br>score <sup>b</sup> : 0.519         |
| 45 | 27201 | 27359 | 52  | RecT family protein<br>(recombination)                         | BLASTP:<br>E-value: 3 <sup>-11</sup>           |
| 46 | 27356 | 28051 | 231 | hypothetical protein                                           | RAST                                           |
| 47 | 28051 | 28311 | 86  | hypothetical protein<br>Fold: DNA/RNA 3 helical<br>bundle      | Phyre2<br>Confidence: 18.8 %<br>Identity: 27 % |
| 48 | 28308 | 28736 | 142 | putative antiCRISPR protein                                    | PaCRISPR<br>score <sup>b</sup> : 0.644         |
| 49 | 28741 | 29109 | 122 | HNH<br>endonuclease/recombinase                                | BLASTP:<br>E-value: 3 <sup>-04</sup>           |
| 50 | 29106 | 29294 | 62  | capsid                                                         | Phyre2<br>Confidence: 12 %<br>Identity: 44 %   |
| 51 | 29291 | 29539 | 82  | hypothetical protein                                           | RAST                                           |
| 52 | 29546 | 30763 | 405 | plasmid replication/partition<br>related protein (replication) | RAST                                           |
| 53 | 30753 | 31322 | 189 | hypothetical protein                                           | RAST                                           |
| 54 | 31319 | 31696 | 125 | hypothetical protein                                           | RAST                                           |
| 55 | 31734 | 32126 | 130 | Isomerase; DNA-binding<br>protein;gyrase (replication)         | Phyre2<br>Confidence: 61.6 %<br>Identity: 29 % |
| 56 | 32123 | 32263 | 46  | SAM-Mtase                                                      | Phyre2<br>Confidence: 11 %<br>Identity: 28 %   |
| 57 | 32363 | 32560 | 65  | Hypothetical protein                                           | RAST                                           |
| 58 | 32557 | 33750 | 397 | Adenine-specific<br>methyltransferase (EC<br>2.1.1.72)         | RAST                                           |
| 59 | 33747 | 35816 | 689 | DNA primase/helicase, phage-<br>associated                     | RAST                                           |

|    |       |       |     |                                              |                                                |
|----|-------|-------|-----|----------------------------------------------|------------------------------------------------|
| 60 | 35782 | 36111 | 109 | hypothetical protein                         | RAST                                           |
| 61 | 36112 | 36429 | 105 | hypothetical protein                         | RAST                                           |
| 62 | 36426 | 36911 | 161 | putative hydrolase/restrictions endonuclease | Phyre2<br>Confidence: 93.4 %<br>Identity: 20 % |
| 63 | 36911 | 37078 | 55  | exonuclease                                  | Phyre2<br>Confidence: 8.1 %<br>Identity: 14 %  |

a: number of amino acids

b: probability to be an antiCRSPR protein (<https://pacrispr.erc.monash.edu>)

c: highest identities of deduced Blf4 proteins with at least three proteins in Aclame phages (<http://aclame.ulb.ac.be>)

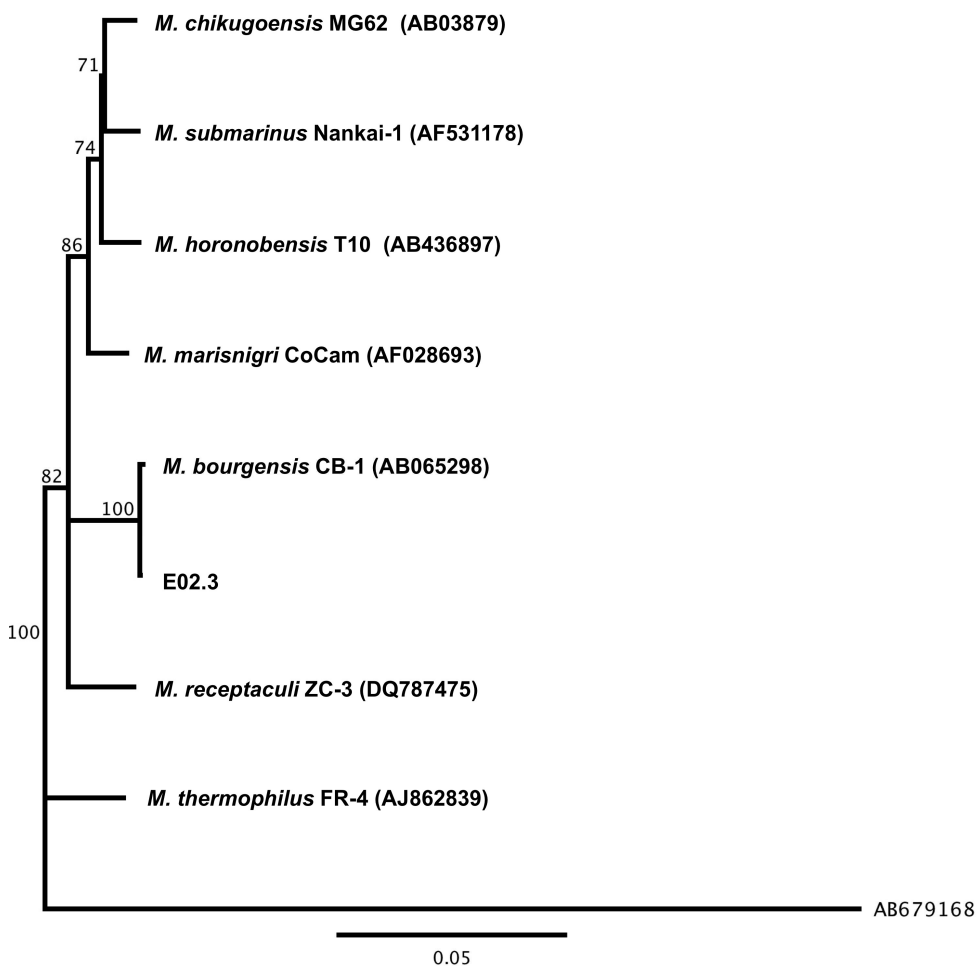

Supplementary Figure S1: Phylogenetic position of strain E02.3 within the genus *Methanoculleus*. Neighbor-joining tree constructed using MEGA in Geneious10.2.5 from a CLUSTAL W alignment of a 16S rRNA gene fragments (1,395 bp) of strain E02.3 and of corresponding sequences representing the genus *Methanoculleus* (GenBank accession numbers in parentheses), with *Methanotrix concilii* NBRC 103675 (AB679168) as the outgroup. Distance was corrected via Jukes & Cantor, the bootstrap values are based on 1000 replications; only values >50 % are shown. Bar, 0.05 evolutionary distance.

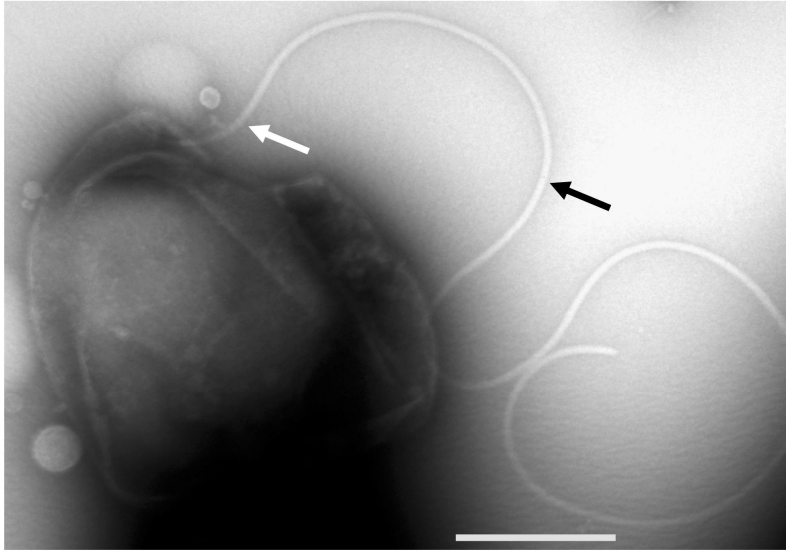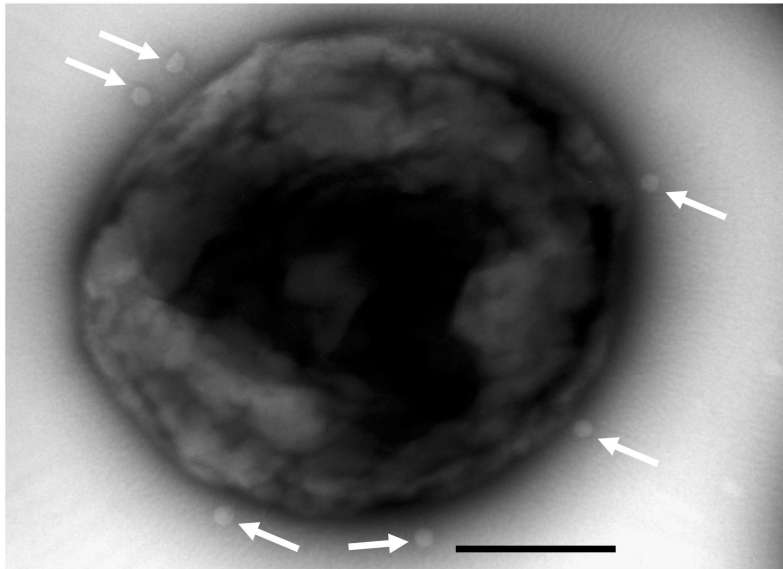

Supplementary Figure S2: Attachment of virus Blf4 to *M. bourgensis* E02.3. Top: virus (white arrow) attachment to cell appendage (presumably flagellum, black arrow) originating from a *M. bourgensis* E02.3 cell. Bottom: several virus particles (white arrows) attached to a *M. bourgensis* E02.3 cell; bars = 500 nm; TEM was conducted as described in Materials and Methods.

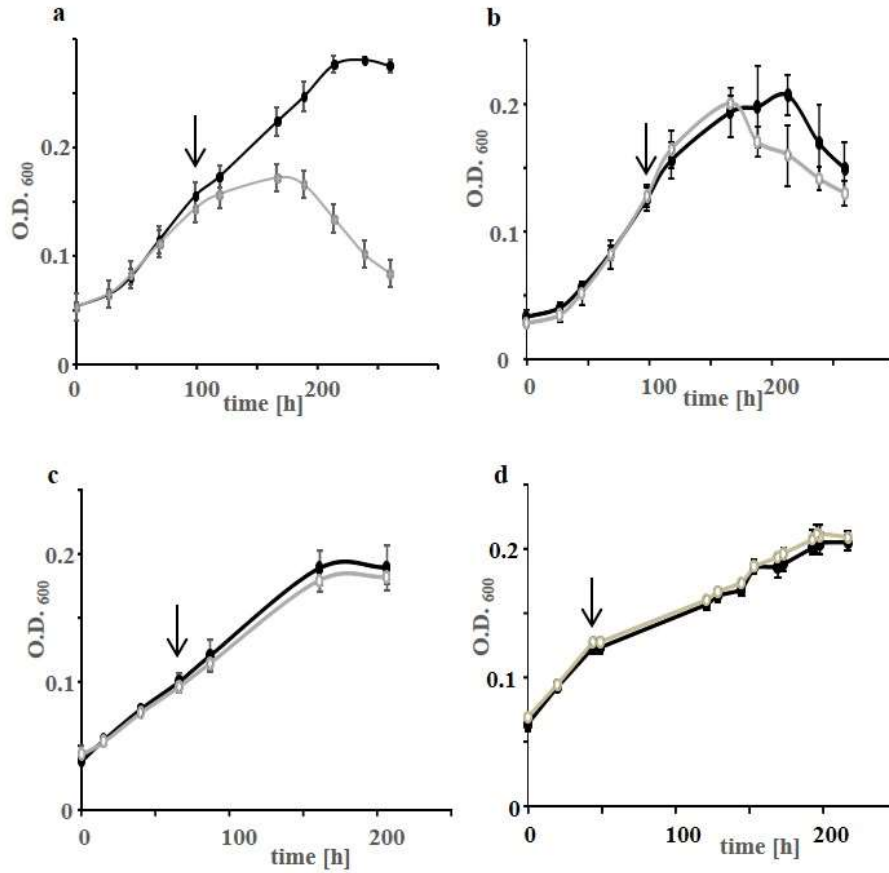

Supplementary Figure S3: Host range of virus Blf4. Representative growth curve of different *Methanoculleus* strains (50 ml, black lines), (a) *M. bourgensis* E02.3, (b) *M. bourgensis* MS2<sup>T</sup> (DSM 3045), (c) *M. marisnigri* AN8 (DSM 4552), and (d) *M. thermophilus* CR1<sup>T</sup> (DSM 2373). Strains (grey lines) were challenged with 0.5 ml filtrated Blf4-lysed culture supernatant (indicated with arrow) and turbidity was measured at 600 nm; shown are average values and their standard deviations (error bars) of three biological replicates.

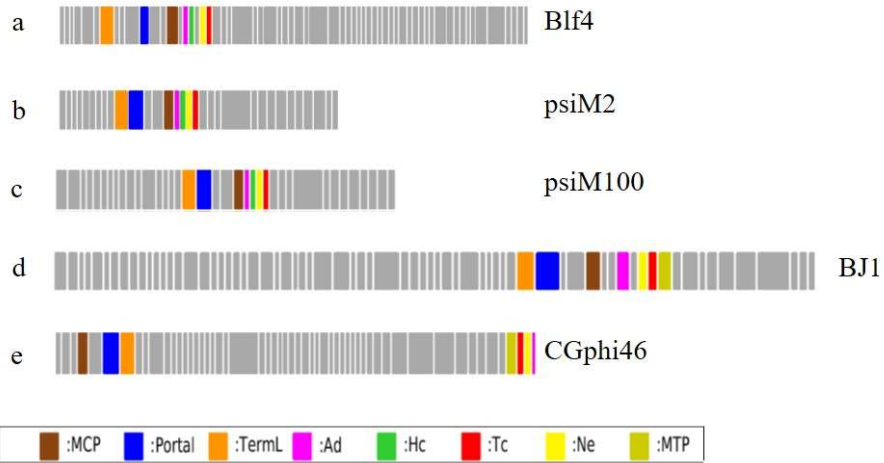

Supplementary Figure S4: VIRFAM analysis by head-neck-tail module search

The genomes of virus Blf4 (a) and the four members of the *Siphoviridae* infecting archaea [virus psi( $\Psi$ )M2 (b); psi( $\Psi$ )M100 (c); BJ1 (d) and CGphi46 (e)] were analyzed using the head-neck-tail module of the VIRFAM analysis tool (see Materials and Methods). Highlighted are the genes for major capsid protein (MCP, brown), the portal protein (Portal, blue), terminase (TermL, orange), head tail adapter (Ad; pink), head closure protein (Hc, green), tail completion protein (Tc, red), neck protein (Ne, yellow), and major tail protein (MTP, beige).
